# Supplementary material for: Addressable surface engineering for N-doped WS2 nanosheet arrays with abundant active sites and the optimal local electronic structure for enhanced hydrogen evolution reaction
Source: Royal Society of Chemistry journal article supplement (doi:10.1039/d0nr06354a), 2020-01-01
Supplement: d0nr06354a1.pdf [file d0nr06354a1.pdf]

# **Addressable surface engineering for N doped WS<sub>2</sub> nanosheet arrays with abundant active sites and optimal local electronic structure for enhanced hydrogen evolution reaction**

*Haiqing Wang,<sup>\*, #, a</sup> Zhongfei Xu,<sup>#, b</sup> Zengfu Zhang,<sup>a</sup> Shuxian Hu,<sup>\*, b</sup> Mingjun Ma,<sup>a</sup>*

*Zhicheng Zhang,<sup>\*, c</sup> Weijia Zhou,<sup>a</sup> Hong Liu,<sup>\*, a, d</sup>*

<sup>a</sup> Collaborative Innovation Center of Technology and Equipment for Biological  
Diagnosis and Therapy in Universities of Shandong, Institute for Advanced  
Interdisciplinary Research (iAIR), University of Jinan, Jinan 250022, China

<sup>b</sup> Beijing Computational Science Research Center, Beijing 100193, China

<sup>c</sup> Tianjin Key Laboratory of Molecular Optoelectronic Sciences, Department of  
Chemistry, School of Science, Tianjin University, Tianjin 300072, China.

<sup>d</sup> State Key Laboratory of Crystal Materials, Shandong University, Jinan 250100, PR  
China.

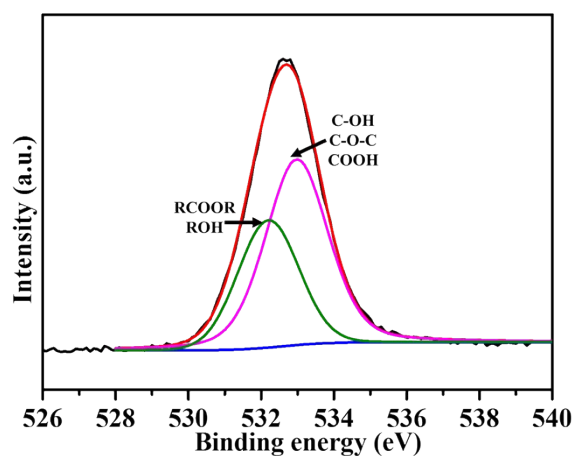

Figure S1 High resolution O 1s of CC-60 sample.

The results is indicative of -O functional groups in hydroxyls, ethers, lactones, and/or carboxyls.

(J. Sanchez, T. R. Hellstern, L. A. King and T. F. Jaramillo, Adv. Energy Mater., 2019, 9, 1901824.)

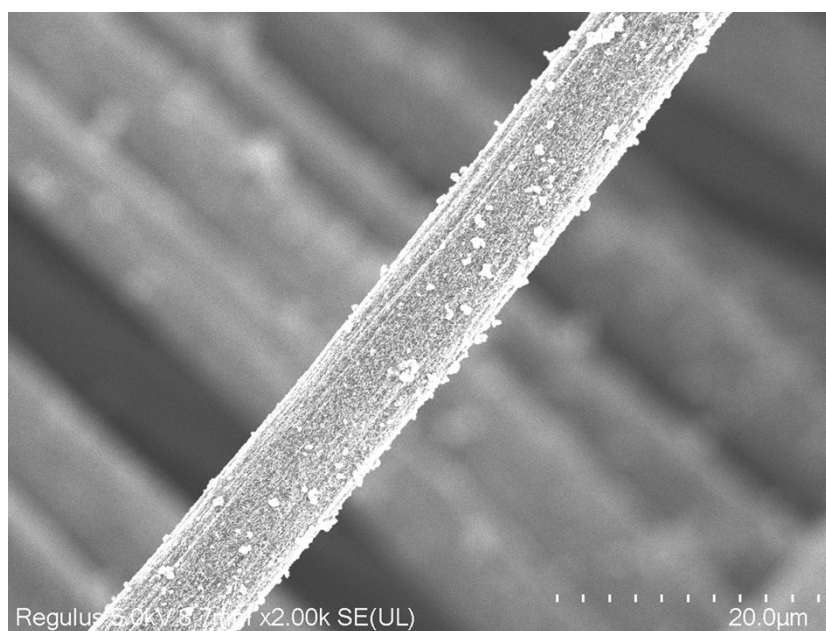

Figure S2. SEM image of WS<sub>2</sub>-CC-60 with low magnification.

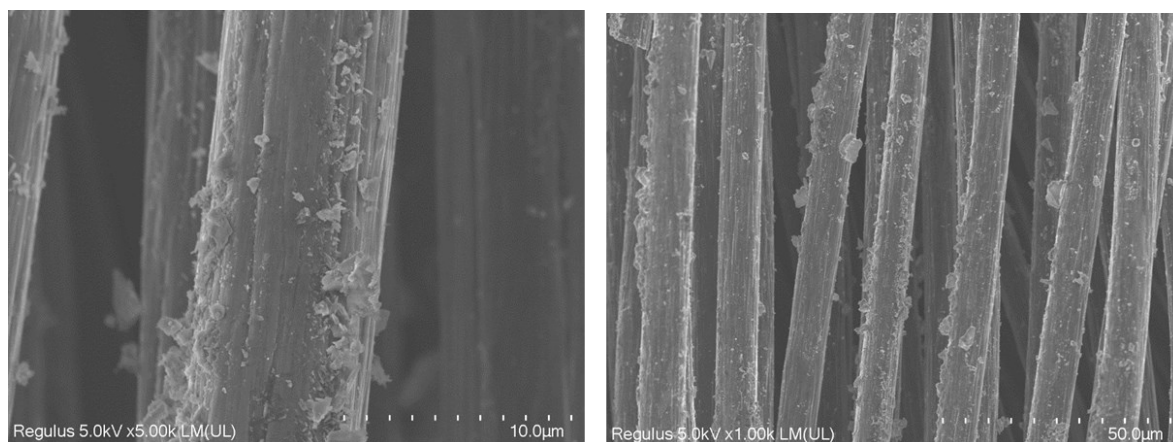

Figure S3. SEM images of WS<sub>2</sub>@mixed acid (HNO<sub>3</sub> and H<sub>2</sub>SO<sub>4</sub>) treated CC.

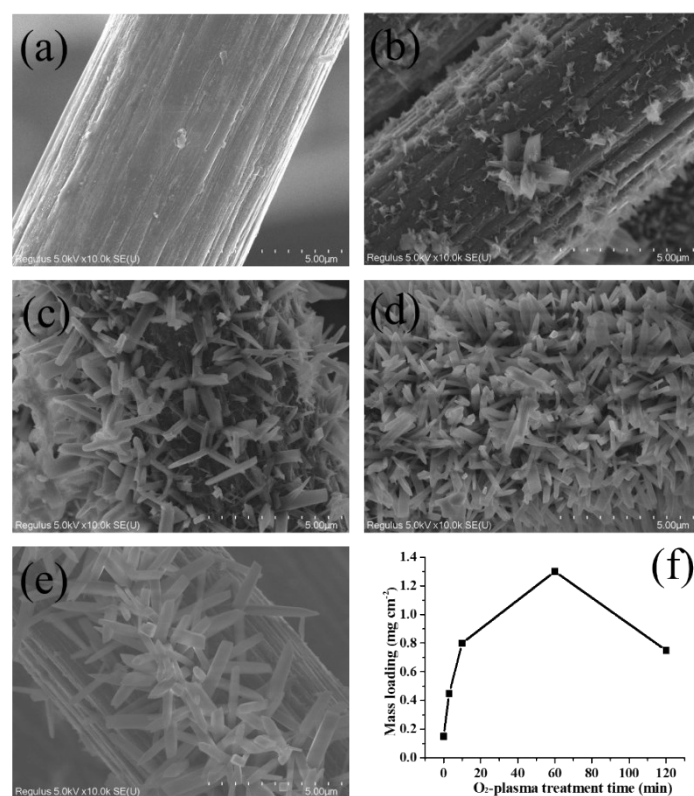

Figure S4. SEM images of Co-MOF-0/3/10/60/120 from a to e.

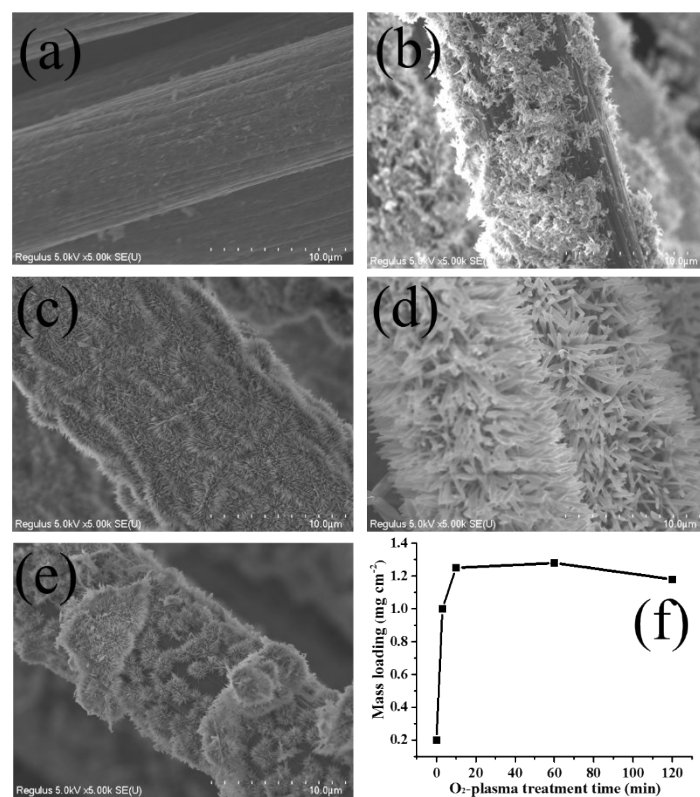

Figure S5. SEM images of NiCoOH/O-0/3/10/60/120 from a to e.

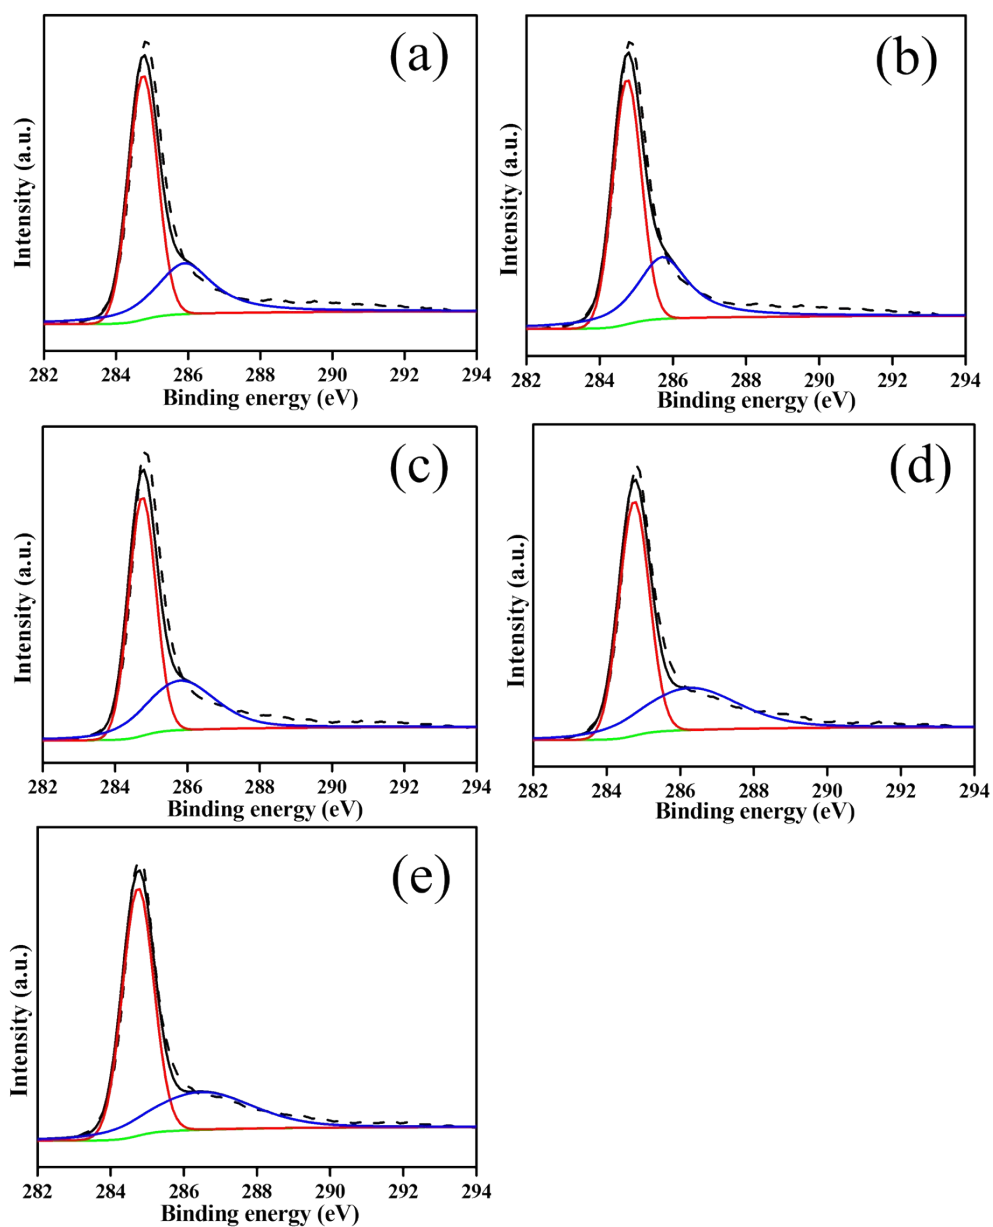

Figure S6. XPS spectra of C 1s peaks of CC-0/3/10/60/120 from a to e, where blue line represents C sp<sup>3</sup> and red line represents C sp<sup>2</sup>.

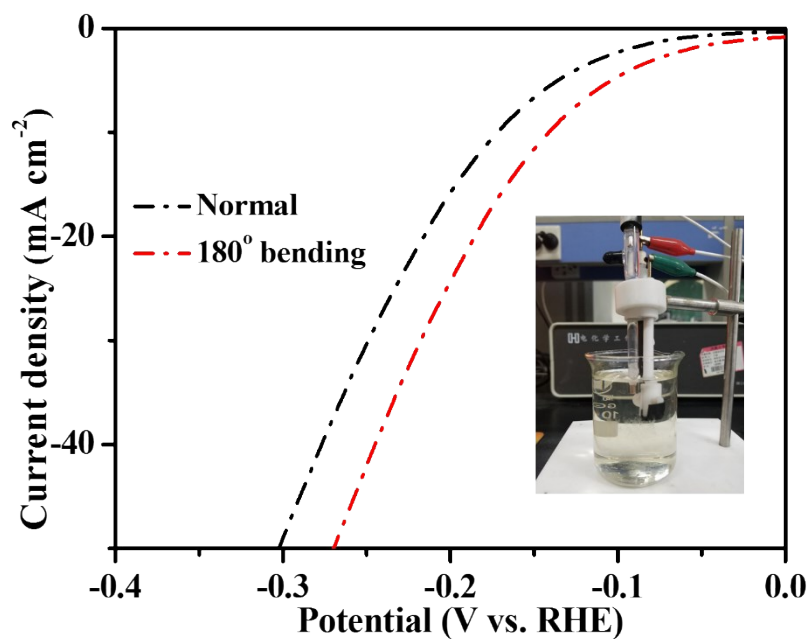

Figure S7. HER performance of N-WS<sub>2</sub> under different bending conditions of 180°

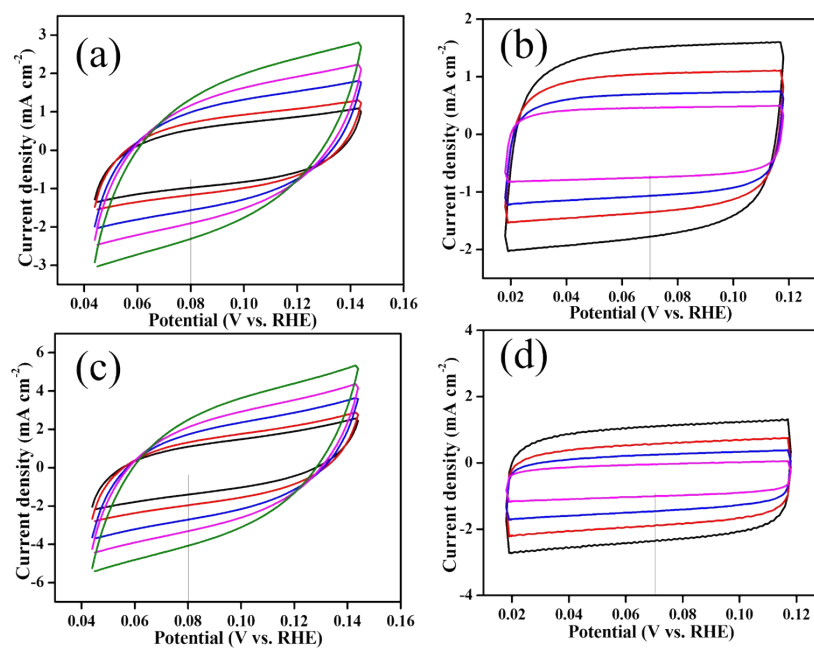

Figure S8 Non-Faradaic scan for double-layer capacitance. (a and c) and (b and d) cyclic voltammetry for acid and alkaline HER, respectively, for measuring  $C_{dl}$  of WS<sub>2</sub> and N-WS<sub>2</sub>.

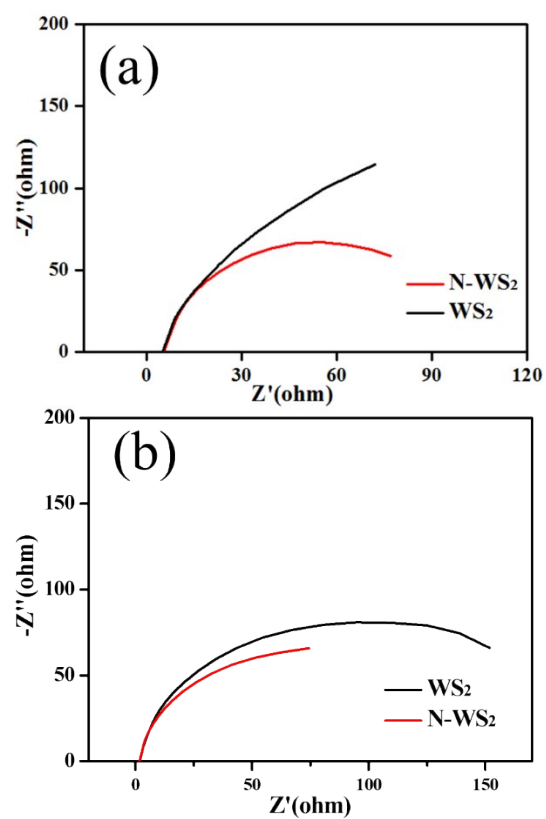

Figure S9 EIS Nyquist plots (a) and (b) of  $WS_2$  and  $N-WS_2$  in alkaline and acid conditions, respectively.

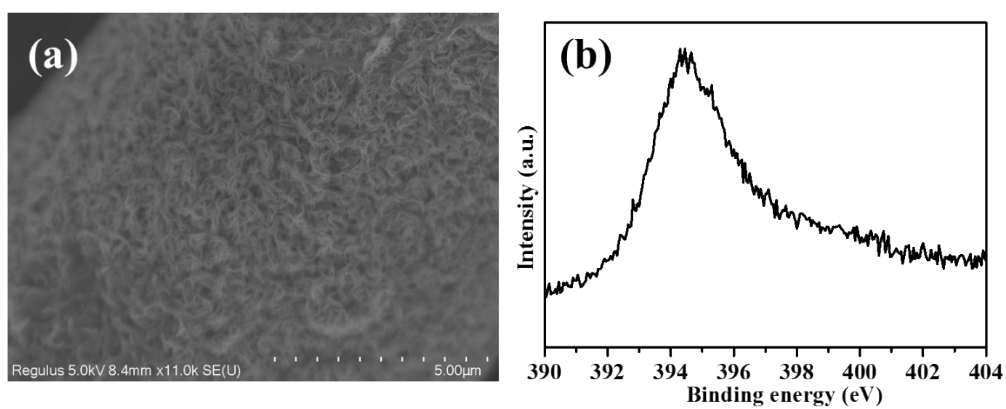

Figure S10 SEM image (a) and high resolution N 1s (b) of  $N-WS_2$  after stability test.
